# Supplementary material
Source: ML conference proceedings conference paper supplement (https://proceedings.mlr.press/v89/gasthaus19a.html)
Supplement: Supplementary file [file gasthaus19a-supp.pdf]

|                            | electricity    | traffic  | wiki         | dominick      |
|----------------------------|----------------|----------|--------------|---------------|
| # time series              | 370            | 963      | 9013         | 100014        |
| time granularity           | hourly         | hourly   | daily        | weekly        |
| domain                     | $\mathbb{R}_+$ | $[0, 1]$ | $\mathbb{N}$ | $(-100, 100)$ |
| encoder length             | 96             | 96       | 60           | 16            |
| decoder length             | 24             | 24       | 60           | 12            |
| batch size                 | 256            | 256      | 256          | 256           |
| learning rate              | 5e-3           | 5e-3     | 5e-3         | 5e-3          |
| learning rate decay factor | 0.4            | 0.4      | 0.4          | 0.4           |
| # learning rate max decays | 4              | 4        | 4            | 4             |
| early stopping patience    | 20             | 20       | 20           | 20            |
| # LSTM layers              | 2              | 2        | 2            | 2             |
| # LSTM nodes               | 80             | 80       | 80           | 80            |

Table 3: Dataset details and RNN parameters.

## A Details on Accuracy Scores

The summations of all the metrics are over all time series, i.e.,  $i = 1, \dots, N$ , and over the whole prediction range, i.e.,  $t = T - t_0 + 1, \dots, T$ , unless the range is explicitly provided. The value  $m$  in the MASE and MSIS metrics is the seasonal frequency which is set to 1 for yearly, weekly and daily data, 4 for quarterly data, 12 for monthly data, and 24 for hourly data, following the M4 competition definitions. Finally,  $\rho$  defines the prediction interval, i.e.,  $\rho = 0.05$  for a 95% interval, and  $\hat{u}, \hat{l}$  are the  $1 - \rho/2, \rho/2$  quantiles of the predictive distribution.

$$\text{QL\#} = \frac{\sum_{i,t} \Lambda(\hat{q}(\#), z_{i,t})}{\sum_{i,t} |z_{i,t}|}, \quad (18)$$

$$\text{QLm} = \frac{1}{99}(\text{QL1} + \text{QL2} + \dots + \text{QL99}), \quad (19)$$

$$\text{ND} = \frac{\sum_{i,t} |z_{i,t} - \hat{z}_{i,t}|}{\sum_{i,t} |z_{i,t}|}, \quad (20)$$

$$\text{NRMSE} = \frac{\sqrt{\frac{1}{N(T-t_0)} \sum_{i,t} (z_{i,t} - \hat{z}_{i,t})^2}}{\frac{1}{N(T-t_0)} \sum_{i,t} |z_{i,t}|}, \quad (21)$$

$$\text{sMAPE} = \frac{1}{N(T-t_0)} \sum_{i,t} \frac{2|z_{i,t} - \hat{z}_{i,t}|}{|z_{i,t}| + |\hat{z}_{i,t}|} \quad (22)$$

$$\text{MASE} = \frac{1}{N(T-t_0)} \sum_i \frac{\sum_t |z_{i,t} - \hat{z}_t|}{\frac{1}{(T-m)} \sum_{t=m+1}^T |z_{i,t} - z_{i,t-m}|}, \quad (23)$$

$$\text{MSIS} = \frac{1}{N(T-t_0)} \sum_i \frac{\sum_t \hat{u}_{i,t} - \hat{l}_{i,t} + \frac{2}{\rho}(\hat{l}_{i,t} - z_{i,t})\mathcal{I}_{[z_{i,t} < \hat{l}_{i,t}]} + \frac{2}{\rho}(z_{i,t} - \hat{u}_{i,t})\mathcal{I}_{[z_{i,t} > \hat{u}_{i,t}]}}{\sum_{t=m+1}^T |z_{i,t} - z_{i,t-m}|}. \quad (24)$$

## B Details on Data sets and Hyperparameters

All the hyperparameters (shown in Table 3) were selected by performing a grid search only on the **electricity** dataset, and were used as default values on all the other datasets, i.e., **traffic**, **wiki**, **dominick**, as well as the dataset of the M4 competition.

### Evaluating the CRPS Integral for Linear Splines

In Section 3.3 we gave an analytic expression for the CRPS integral when the quantile function is a linear spline. Here we will provide the basic steps of the solution. Consider a value  $\tilde{a}$  such that  $q(\tilde{a}) = z$ . Then, the CRPS integral can be written as follows:

$$\int_0^1 2\Lambda_\alpha(q(\alpha), z)d\alpha = \int_0^1 2(\alpha - \mathcal{I}_{[z < q(\alpha)]})(z - q(\alpha)) \quad (25)$$

$$= \int_0^{\tilde{a}} 2\alpha(z - q(\alpha)) + \int_{\tilde{a}}^1 2(\alpha - 1)(z - q(\alpha)), \quad (26)$$

since  $q(\alpha)$  is non-decreasing.

The value of  $\tilde{a}$  can be found by solving the equation  $q(\tilde{a}) = z$ :

$$\gamma + \sum_{l=0}^L b_l(\tilde{a} - d_l)_+ = z \iff \tilde{a} = \frac{z - \gamma + \sum_{l=0}^{l_0} b_l d_l}{\sum_{l=0}^{l_0} b_l}, \quad (27)$$

where the index  $l_0$  of the summation, with  $0 \leq l_0 \leq L$  and  $d_0 = 0$ , is such that  $d_{l_0} \leq \tilde{a} \leq d_{l_0+1}$ , since the terms for  $l = l_0 + 1, \dots, L$  become zero due to the  $(\cdot)_+$  function.

The index  $l_0$  is straightforward to compute: we know that  $q(d_{l_0}) \leq q(\tilde{a}) \leq q(d_{l_0+1})$ , therefore we can sequentially evaluate the spline at the knot points  $d_l, \forall l$  and find the largest knot  $d_l$  such that  $q(d_l) \leq q(\tilde{a})$ . The index of this knot is the index  $l_0$  and it can be found in  $O(L)$  time.
